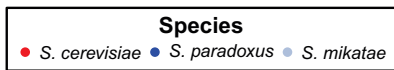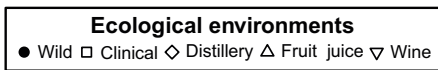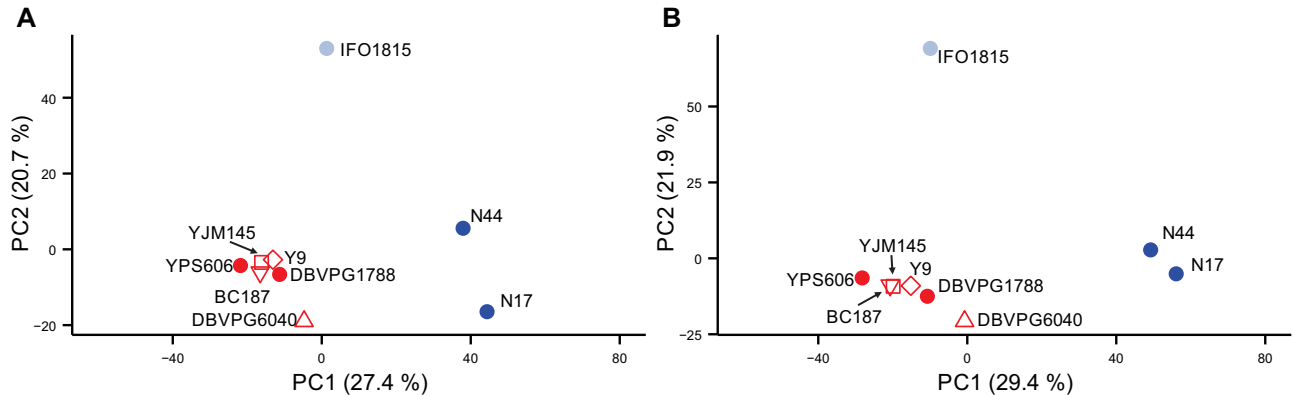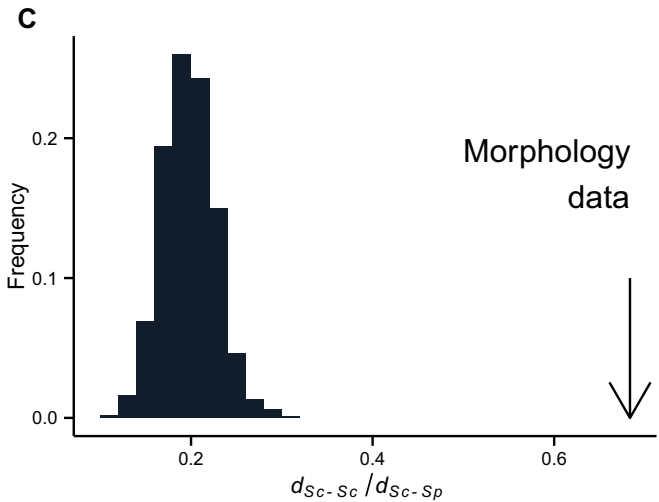

**Figure S3**
